# Supplementary material for: Synthesis of walnut-like hierarchical structure with superhydrophobic and conductive properties
Source: Royal Society of Chemistry journal article supplement (doi:10.1039/c0jm01705a), 2010-01-01
Supplement: c0jm01705a.pdf [file c0jm01705a.pdf]

## Supporting Information

### Synthesis of Walnut-like Hierarchical Structure with Superhydrophobic and Conductive Properties

*Nina Jiang<sup>a</sup>, Yiting Xu<sup>a</sup>, Ning He<sup>b</sup>, Jiangfeng Chen<sup>a</sup>, Yuanming Deng<sup>a</sup>, Conghui Yuan<sup>a</sup>,  
Guobin Han<sup>b</sup> and Lizong Dai<sup>\*a</sup>*

<sup>a</sup> Key Laboratory of Fire Retardant Materials of Fujian Province, College of Materials, Xiamen University, 361005, P.R.China

<sup>b</sup> College of Chemistry and Chemical Engineering, Xiamen University, 361005, P.R.China

\*To whom correspondence should be addressed.

Tel: +86 0592-2186178      Fax: +86 0592-2183979

E-mail: lzdai@xmu.edu.cn;

Fig. s1 SEM images and size distribution of monodispersed PS microspheres

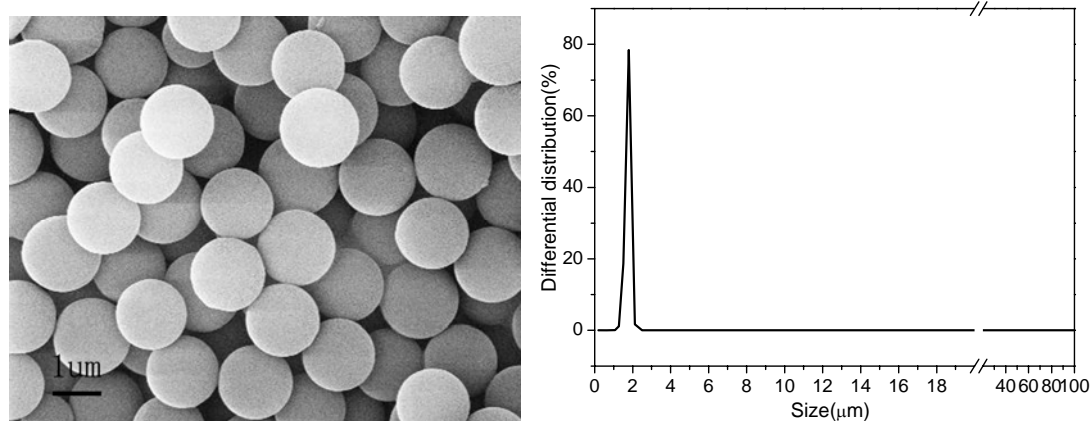

Fig. S2 A photograph of  $C_{10}$ DAB solutions and  $C_{12}$ TAC solutions containing bromothymol blue

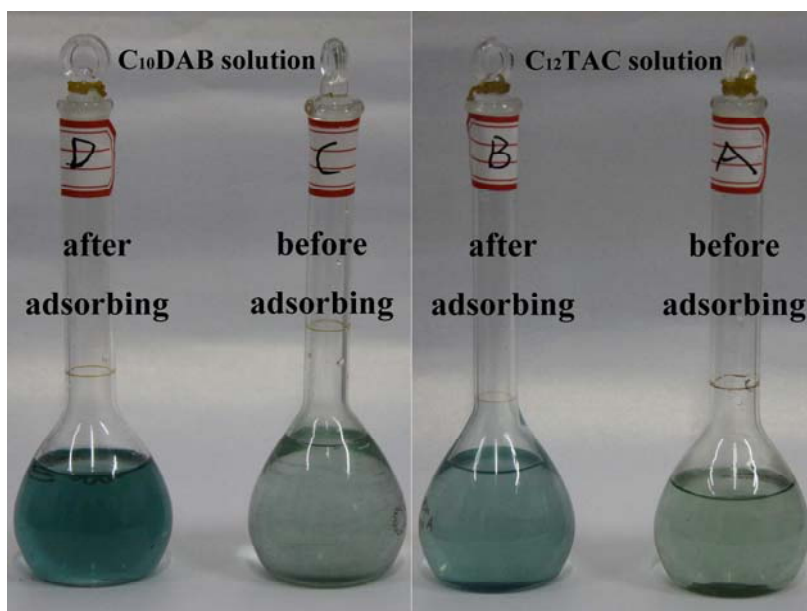

Fig. S3 SEM images of PS/PANI composite particles synthesized without the cationic surfactant.  
Other synthetic conditions: The mass ratio of PS and aniline is 10:1, room temperature

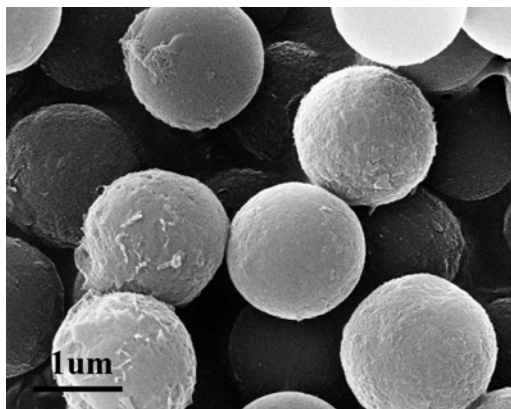

Fig. S4 SEM images of the PS/PANI hierarchical structure synthesized at 4°C and with different polymerization times. Other synthetic conditions: The mass ratio of PS and aniline is 10:1, C<sub>10</sub>DAB.

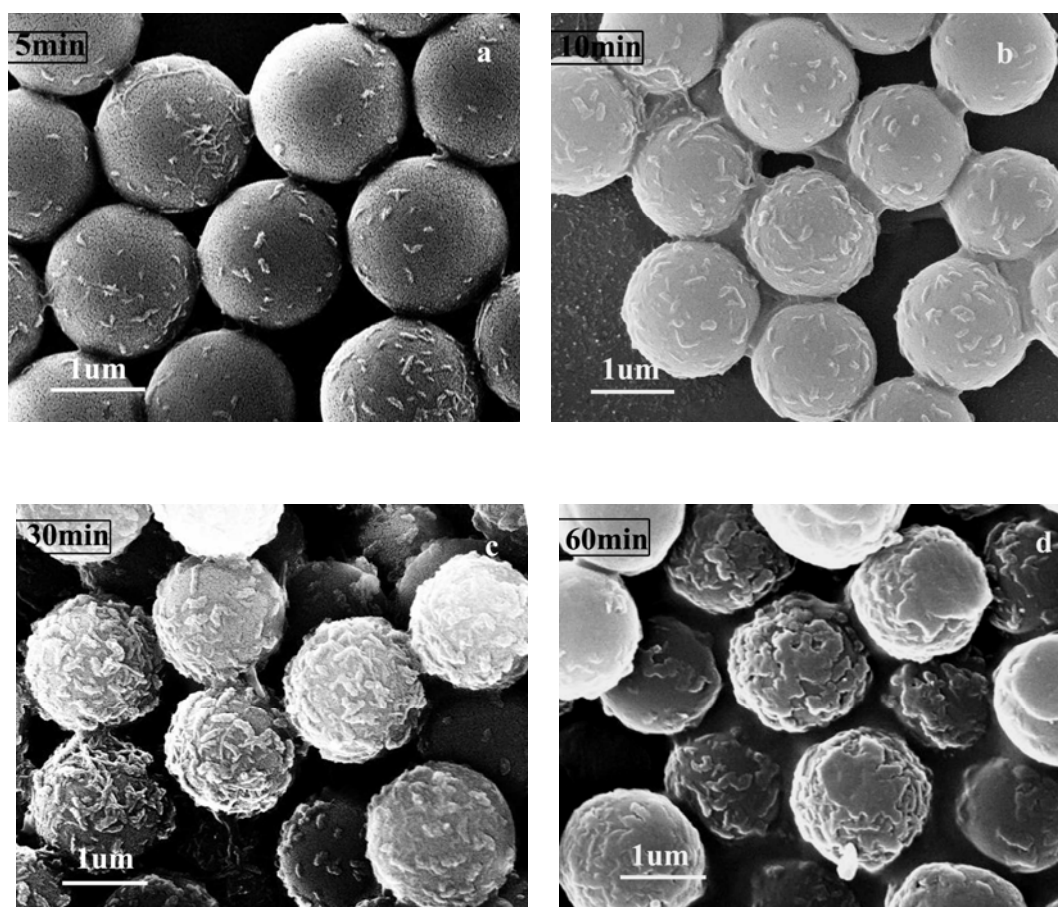

Table s1. The CHN element microanalysis of the walnut-like PS/PANI Particles <sup>a</sup>

| Name                                     | Weight<br>(mg) | C<br>(wt%) | N<br>(wt%) | H<br>(wt%) | PANI<br>Loading<br>(wt%) |
|------------------------------------------|----------------|------------|------------|------------|--------------------------|
| Walnut-like<br>hierarchical<br>structure | 3.2890         | 88.96      | 0.877      | 9.179      | 5.826                    |

<sup>a</sup> The PANI loading on the surface of PS microspheres is calculated by using the following equation:

$$\text{PANI Loading (wt\%)} = \frac{N(\text{wt\%})}{M(\text{nitrogen})} \times M(\text{aniline})$$

Table s2. The CHN element microanalysis of the PS/PANI particles synthesized at room temperature <sup>a</sup>

| Name                                     | Weight<br>(mg) | C<br>(wt%) | N<br>(wt%) | H<br>(wt%) | PANI<br>Loading<br>(wt%) |
|------------------------------------------|----------------|------------|------------|------------|--------------------------|
| Walnut-like<br>hierarchical<br>structure | 1.0180         | 88.65      | 0.666      | 7.613      | 4.424                    |

<sup>a</sup> The PANI loading on the surface of PS microspheres is calculated by using the following equation:

$$\text{PANI Loading (wt\%)} = \frac{N(\text{wt\%})}{M(\text{nitrogen})} \times M(\text{aniline})$$
